# Supplementary material for: Attention defines the context for implicit sensorimotor adaptation
Source: PubMed Central journal article supplement — bioRxiv. 2024 Sep 3:2024.09.03.611108. Preprint. [Version 1] doi: 10.1101/2024.09.03.611108 (PMC11398353; doi:10.1101/2024.09.03.611108), 2024-09-03
Supplement: NIHPP2024.09.03.611108v1-supplement-1.pdf [file NIHPP2024.09.03.611108v1-supplement-1.pdf]

## Supplementary

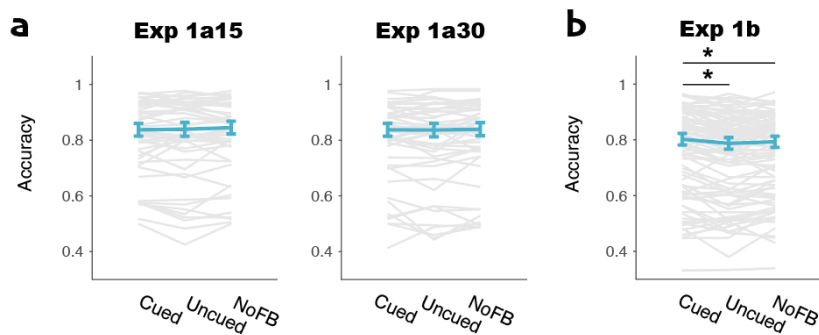

Fig S1. Second task performance of Experiment 1 for the attended, unattended, and no-feedback conditions. a) Accuracy on the bar discrimination task was similar across the three conditions in Experiment 1a, suggesting the feedback has minimal influence on the performance of the secondary task. b) In Experiment 1b, accuracy was higher in the attended condition compared to the other two conditions. This is likely because the red bar is presented on the white cursor in the attended condition, while the bar was presented on the black background in the other two conditions. The former is of higher visual contrast which might account for better discrimination performance in the attended condition. \*,  $p < .05$ .

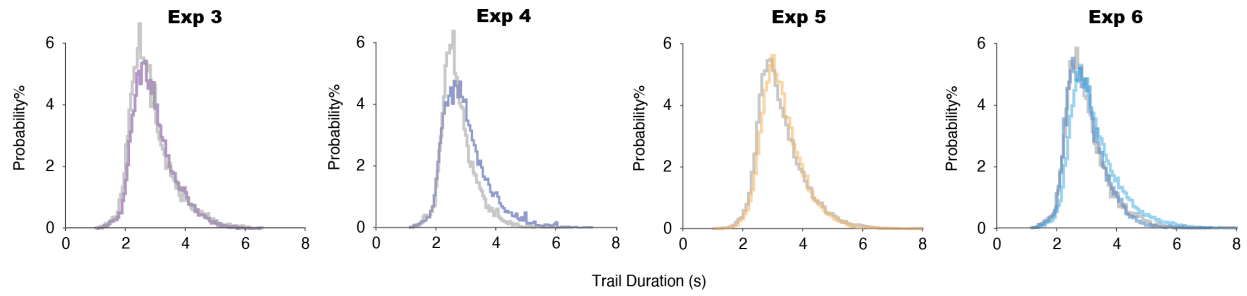

Fig S2. Distributions of trial duration were matched across the single and dual-task conditions in Experiments 3-6. Trial duration is defined as the interval between the onset of trial  $n$  and trial  $n+1$ .

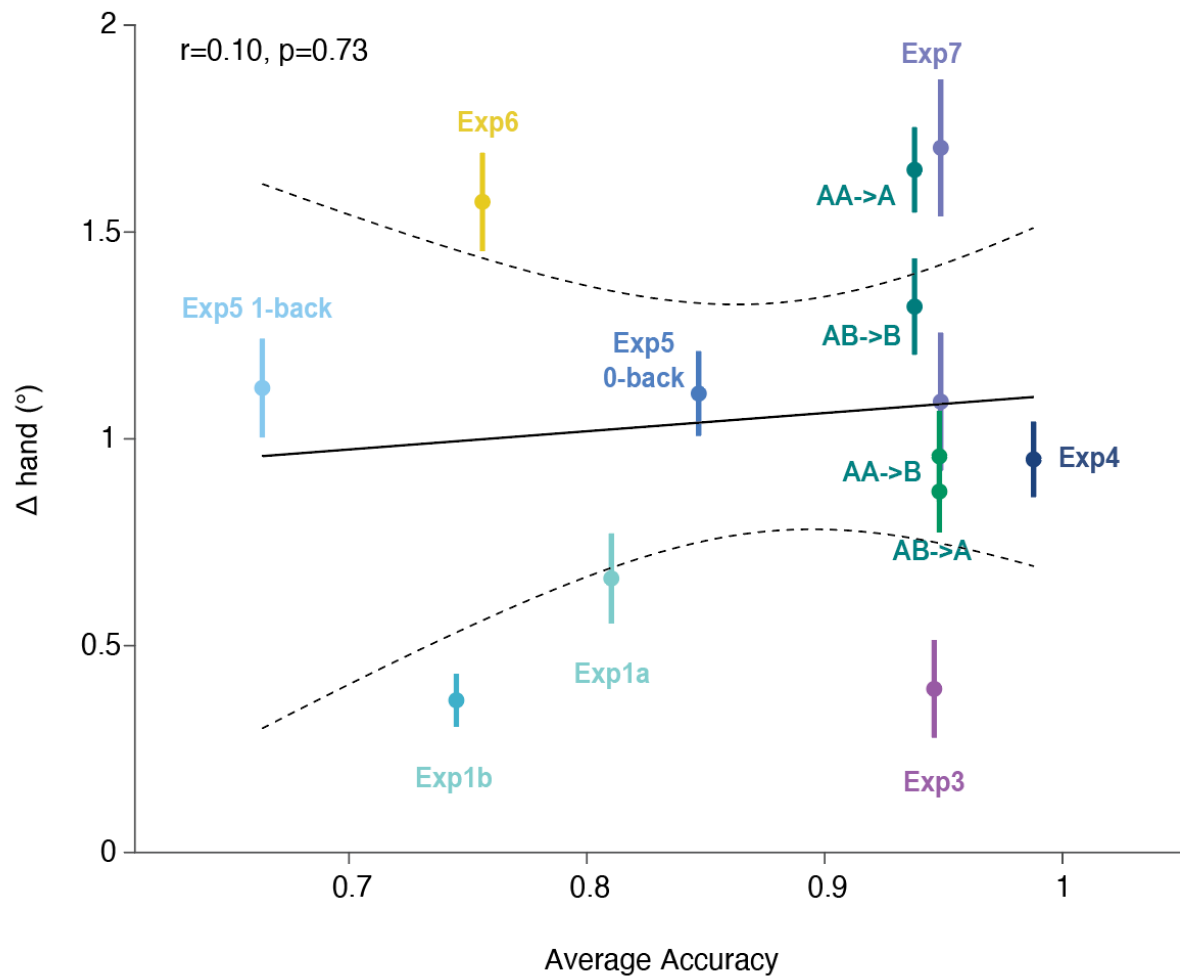

Fig S3. Post-hoc analysis of secondary task difficulty and magnitude of implicit adaptation. As our proxy of difficulty, we used secondary task accuracy.  $\Delta$ hand is plotted as a function of the accuracy. The black line indicates the best-fitted linear model, and the dash lines indicates the 95% confident interval of model. The data suggest minimal correlation between these two variables, providing further evidence that adaptation is not modulated by secondary task difficulty.

Table S1. Sample number of each Experiment.

| Condition           | All Participants | Valid Participant |
|---------------------|------------------|-------------------|
| Experiment 1a 15    | 50               | 35                |
| Experiment 1a 30    | 50               | 38                |
| Experiment 1b       | 95               | 58                |
| Experiment 1c       | 99               | 60                |
| Experiment 2a       | 79               | 64                |
| Experiment 2b       | 96               | 48                |
| Experiment 3 single | 34               | 32                |
| Experiment 3 dual   | 34               | 32                |
| Experiment 4 single | 40               | 36                |
| Experiment 4 dual   | 30               | 27                |
| Experiment 5 single | 33               | 32                |
| Experiment 5 0-back | 40               | 34                |
| Experiment 5 1-back | 56               | 20                |
| Experiment 6 single | 30               | 29                |
| Experiment 6 dual   | 50               | 32                |
| Experiment 7        | 23               | 23                |
| Experiment 8        | 90               | 80                |
| All                 | 929              | 689               |
